# Supplementary figures and images for: A novel diagnostic method of Raman spectroscopy for malignant pheochromocytoma/paraganglioma
Source: Royal Society of Chemistry journal article supplement (doi:10.1039/c6ra18312c), 2016-01-01

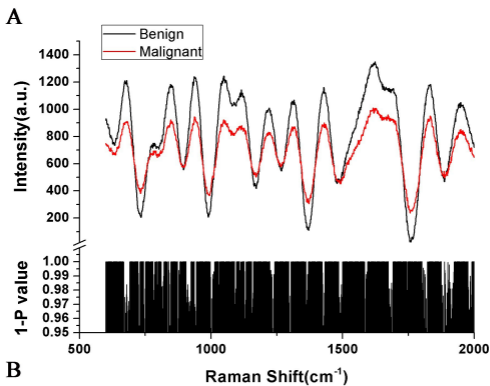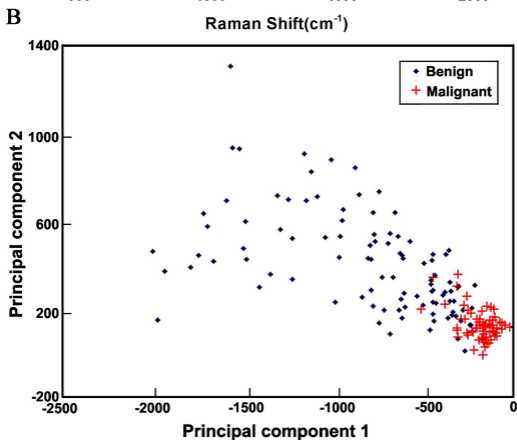

Supplement: c6ra18312c2.pdf [file c6ra18312c2.pdf]
